# Supplementary material for: Epidermal RAF prevents allergic skin disease
Source: eLife journal article supplement (doi:10.7554/elife.14012), 2016-07-18
Supplement: figures [file elife-14012-figures-v3.pdf]

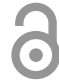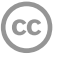

---

## Figures and figure supplements

Epidermal RAF prevents allergic skin disease

**Josipa Raguz et al**

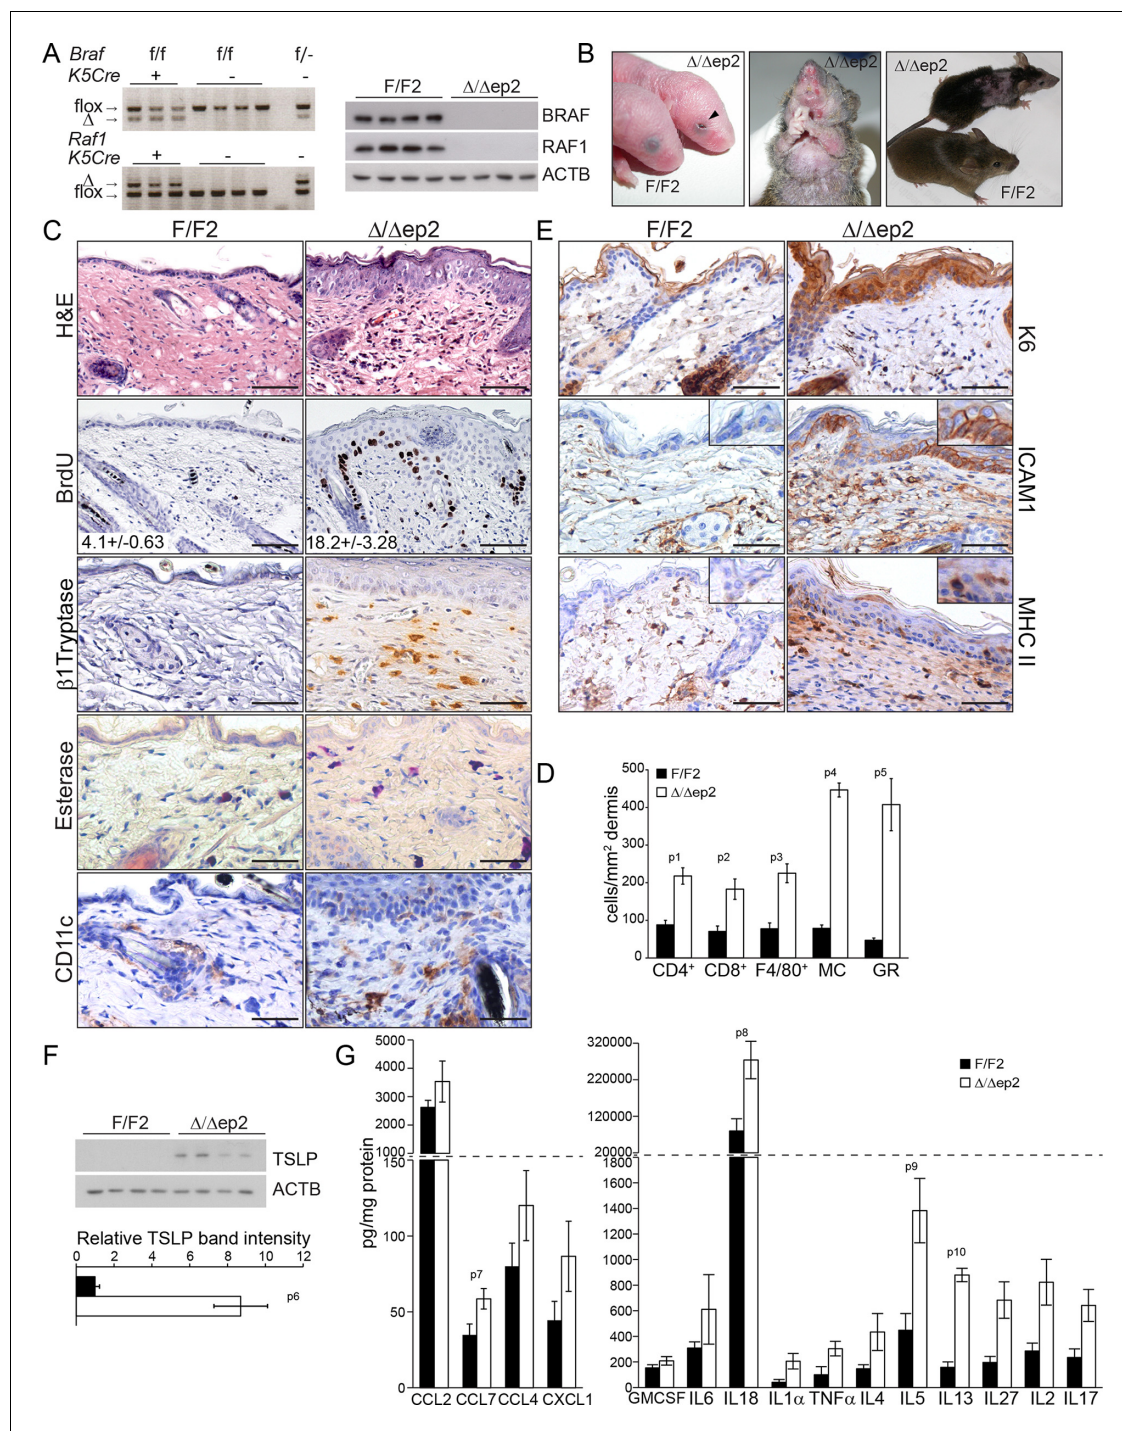

**Figure 1.** Compound deletion of BRAF and RAF1 in the epidermis leads to severe skin inflammation in adult mice. (A) BRAF and RAF1 are efficiently deleted in epidermal cells as shown by PCR analysis of tail tissue and immunoblotting of epidermal lysates isolated from 3 weeks old F/F2 and  $\Delta/\Delta$ ep2 ( $n = 4$ ). ACTB is shown as a loading control. (B) Macroscopic appearance of newborn and adult F/F2 and  $\Delta/\Delta$ ep2 mice. Arrowhead highlights the open eye phenotype of  $\Delta/\Delta$ ep2 pups. (C) Hematoxylin/eosin (H and E) staining shows epidermal thickening and dermal inflammatory infiltrates in  $\Delta/\Delta$ ep2 mice. BrdU incorporation confirms hyperproliferation in the basal layer of  $\Delta/\Delta$ ep2 epidermis. The numbers in the inset represent BrdU<sup>+</sup> cells/mm<sup>2</sup> of epidermis ( $n = 5-7$ , mean  $\pm$  SEM). Infiltrating cells: activated mast cells ( $\beta$ 1 Tryptase<sup>+</sup>), granulocytes (esterase<sup>+</sup>), dendritic cells (CD11c<sup>+</sup>). (D) Quantification of the infiltrating cells: T cells (CD4<sup>+</sup> and CD8<sup>+</sup>), macrophages (F4/80<sup>+</sup>), total mast cells (MC, toluidine blue<sup>+</sup>), granulocytes (GR, esterase<sup>+</sup>). (E) Increased expression of K6, ICAM1, and MHC II in  $\Delta/\Delta$ ep2 keratinocytes/epidermis. Representative images (C, E) and quantification (D) of 5-7 individual couples. Scale bars, 50  $\mu$ m. (F) Inflammatory chemokines and cytokines in epidermal lysates ( $n = 3-4$ ). TSLP levels were determined by immunoblotting and quantified by Image J. ACTB served as a loading control. The results were normalized by arbitrarily setting one of the F/F2

Figure 1 continued on next page

Figure 1 continued

samples as 1 and plotted as mean  $\pm$  SEM. Data represent mean  $\pm$  SEM.  $p = 0.011$ ,  $p1 = 0.001$ ,  $p2 = 0.007$ ,  $p3 = 0.001$ ,  $p4 = 3.06E-6$ ,  $p5 = 1.37E-4$ ,  $p6 = 0.002$ ,  $p7 = 0.049$ ,  $p8 = 0.042$ ,  $p9 = 0.046$  and  $p10 = 0.001$ .

DOI: [10.7554/eLife.14012.003](https://doi.org/10.7554/eLife.14012.003)

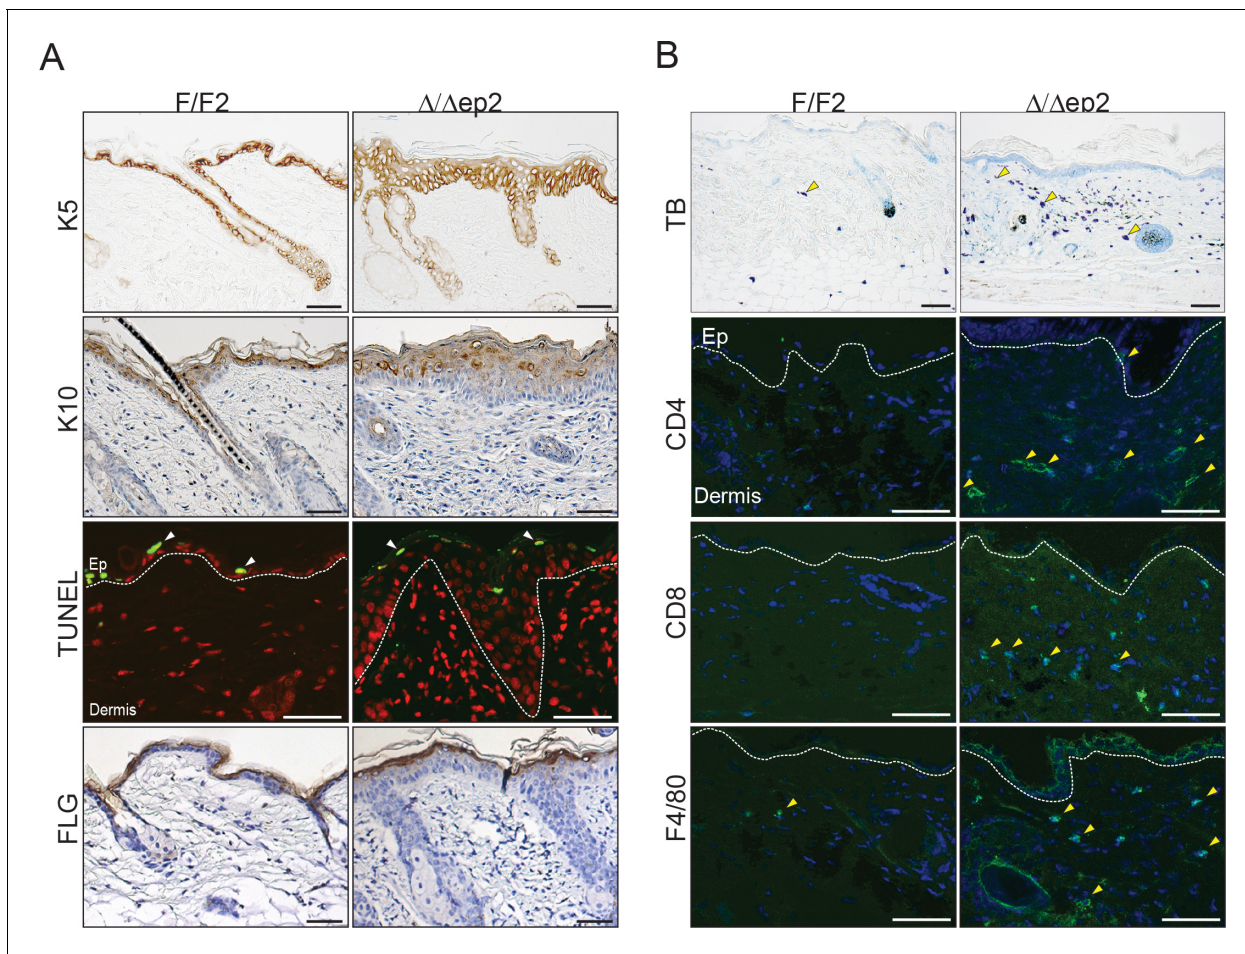

**Figure 1—figure supplement 1.** Local inflammation in adult mice lacking BRAF and RAF1 in the epidermis. (A) Immunohistochemical analysis of epidermal differentiation (K5, K10 and FLG (filaggrin)) and apoptosis (TUNEL+). (B) Skin sections of adult F/F2 and  $\Delta/\Delta ep2$  mice showing dermal infiltration: total mast cells (toluidine blue, TB<sup>+</sup>), macrophages (F4/80<sup>+</sup>) and T cells (CD4<sup>+</sup> and CD8<sup>+</sup>). Arrows indicate positive cells. Quantification is shown in **Figure 1D** (n = 5–7). Scale bars, 50  $\mu$ m.

DOI: [10.7554/eLife.14012.004](https://doi.org/10.7554/eLife.14012.004)



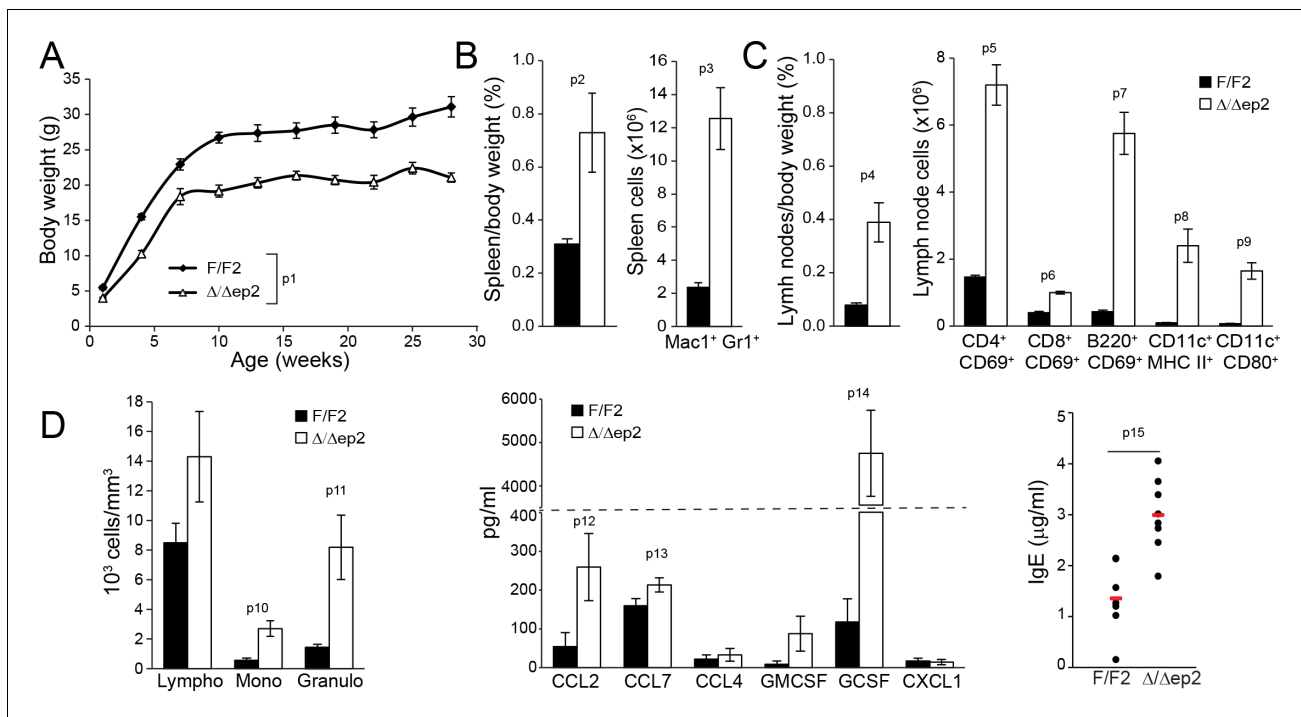

**Figure 2.** Inflammatory response in adult  $\Delta/\Delta ep2$  animals. (A) The body weight of  $\Delta/\Delta ep2$  mice is significantly reduced compared to their littermates (n = 5). The data was analyzed by two-way analysis of variance (ANOVA) test. (B) Increased spleen/body weight ratio and increased numbers of splenic Mac1<sup>+</sup>Gr1<sup>+</sup> cells in adult  $\Delta/\Delta ep2$  animals (n = 4–5). (C) Enlarged lymph nodes and activated T, B, and dendritic cells in adult  $\Delta/\Delta ep2$  (n = 4–8). T cells (CD4<sup>+</sup> or CD8<sup>+</sup>) and B cells (B220<sup>+</sup>) activation was determined by costaining with CD69; activated dendritic cells were identified as CD11c<sup>+</sup> and MHC II<sup>hi</sup> or CD80<sup>+</sup>. (D) Circulating blood cells and plasma levels of chemokines and IgE antibodies in adult mice (n = 6–8). Data represent mean  $\pm$  SEM. p1 = 0.0002, p2 = 0.023, p3 = 0.002, p4 = 0.002, p5 = 9.83E-8, p6 = 6.31E-7, p7 = 2.91E-7, p8 = 0.004, p9 = 0.001, p10 = 0.008, p11 = 0.011, p12 = 0.046, p13 = 0.050, p14 = 3.65E-4 and p15 = 0.001.

DOI: 10.7554/eLife.14012.005

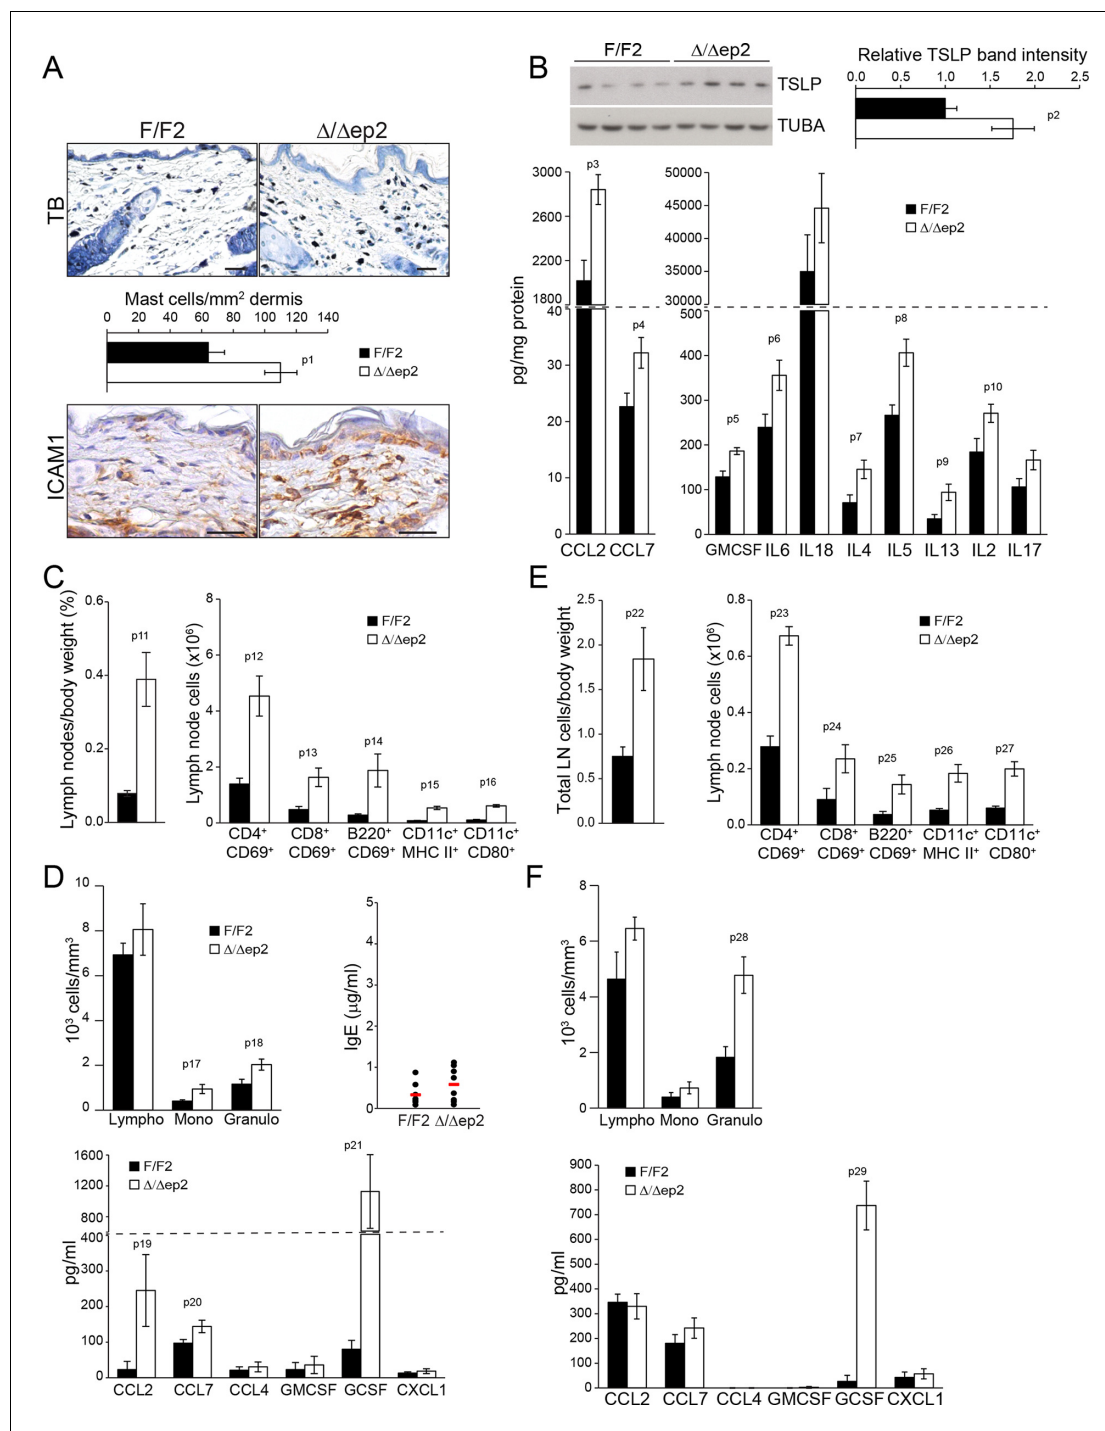

**Figure 3.** Local and systemic inflammatory phenotype in young  $\Delta/\Delta ep2$  animals. (A) Local inflammation in 3 weeks old  $\Delta/\Delta ep2$  animals. Total mast cells (toluidine blue staining, TB; quantified in the plot, n = 4–5) and ICAM1 staining. Scale bars, 25  $\mu m$ . (B) Inflammatory chemokines and cytokines in epidermal lysates (n = 4–5). TSLP levels were determined by immunoblotting and quantified and analyzed as in **Figure 1F**. TUBA served as a loading control. (C, D) Systemic inflammatory parameters in 3 weeks old mice. (C) Lymph node size and composition (n = 4). (D) Circulating blood cells (n = 8) and plasma concentration of IgE (n = 8) and chemokines (n = 9). (E, F) Systemic inflammatory parameters in 10 days old mice. (E) Lymph node size and composition (n = 4–10). (F) Hemogram showing elevated amounts of granulocytes (upper panel, n = 4–7) and plasma chemokine levels showing increased GCSF (n = 4). Data represent mean  $\pm$  SEM. p1 = 0.016, p2 = 0.041, p3 = 0.013, p4 = 0.040, p5 = 0.013, p6 = 0.032, p7 = 0.026, p8 = 0.007, p9 = 0.029, p10 = 0.048, p11 = 0.015, p12 = 0.018, p13 = 0.033, p14 = 0.036, p15 = 3.00E-04, p16 = 3.88E-05, p17 = 0.026, p18 = 0.021, p19 = 0.048, p20 = 0.034, p21 = 0.042, p22 = 0.008, p23 = 0.001, p24 = 0.018, p25 = 0.005, p26 = 0.001, p27 = 0.001, p28 = 0.011 and p29 = 0.014.

DOI: 10.7554/eLife.14012.006

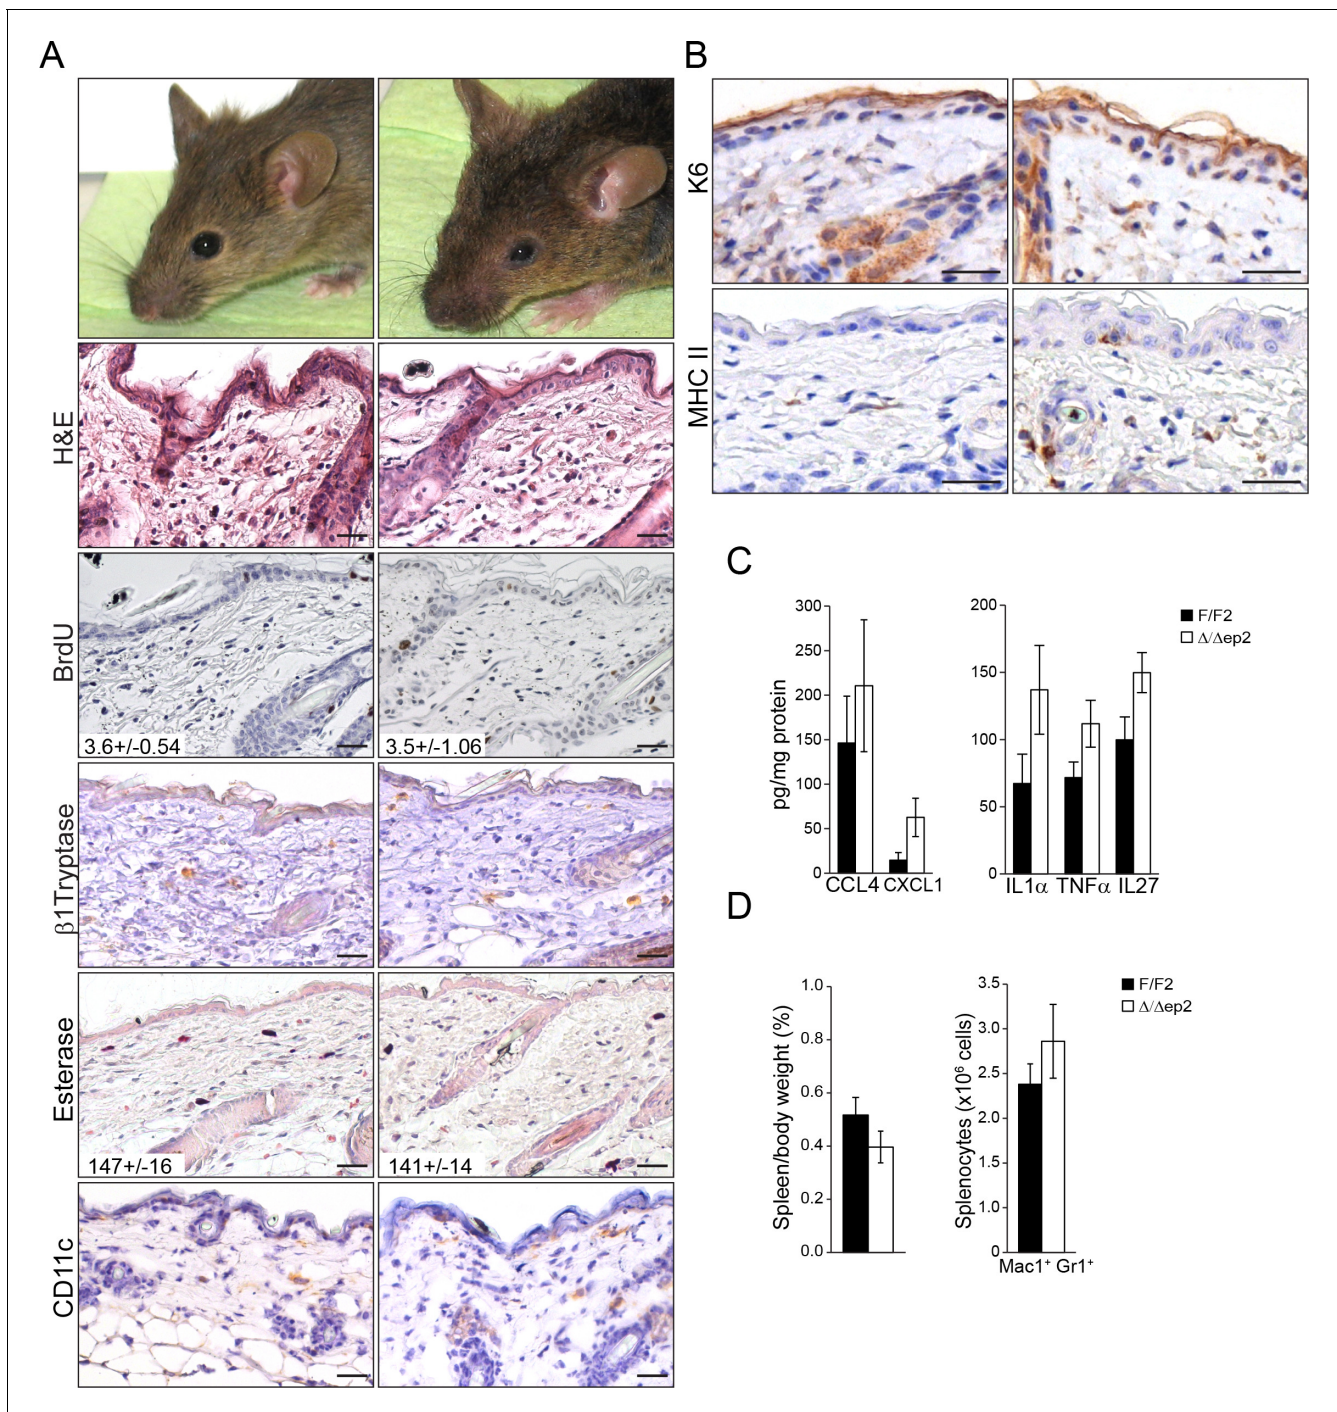

**Figure 3—figure supplement 1.** Local and systemic response in 3 weeks old  $\Delta/\Delta\text{ep}2$  animals. (A) Eyelid inflammation in 3 weeks old  $\Delta/\Delta\text{ep}2$  animals. Skin architecture (H&E), proliferation rate (percentage of BrdU<sup>+</sup> cells in the epidermis), mast cells activation ( $\beta 1$  Tryptase<sup>+</sup>), granulocytes (esterase<sup>+</sup>) and dendritic cell (CD11c<sup>+</sup>) numbers are indistinguishable in 3 weeks old F/F2 and  $\Delta/\Delta\text{ep}2$  littermates. Quantifications of the proliferating cells and granulocytes are shown in the insets (n = 3). (B) Three weeks old  $\Delta/\Delta\text{ep}2$  epidermis does not express the activation markers K6 and MHC II. Scale bars, 25  $\mu\text{m}$ . (C) Inflammatory chemokines and cytokines in 3 weeks old epidermal lysates (n = 5). (D) Normal spleen size and composition in 3 weeks old  $\Delta/\Delta\text{ep}2$  mice (n = 4–6). Data represent mean  $\pm$  SEM.

DOI: [10.7554/eLife.14012.007](https://doi.org/10.7554/eLife.14012.007)

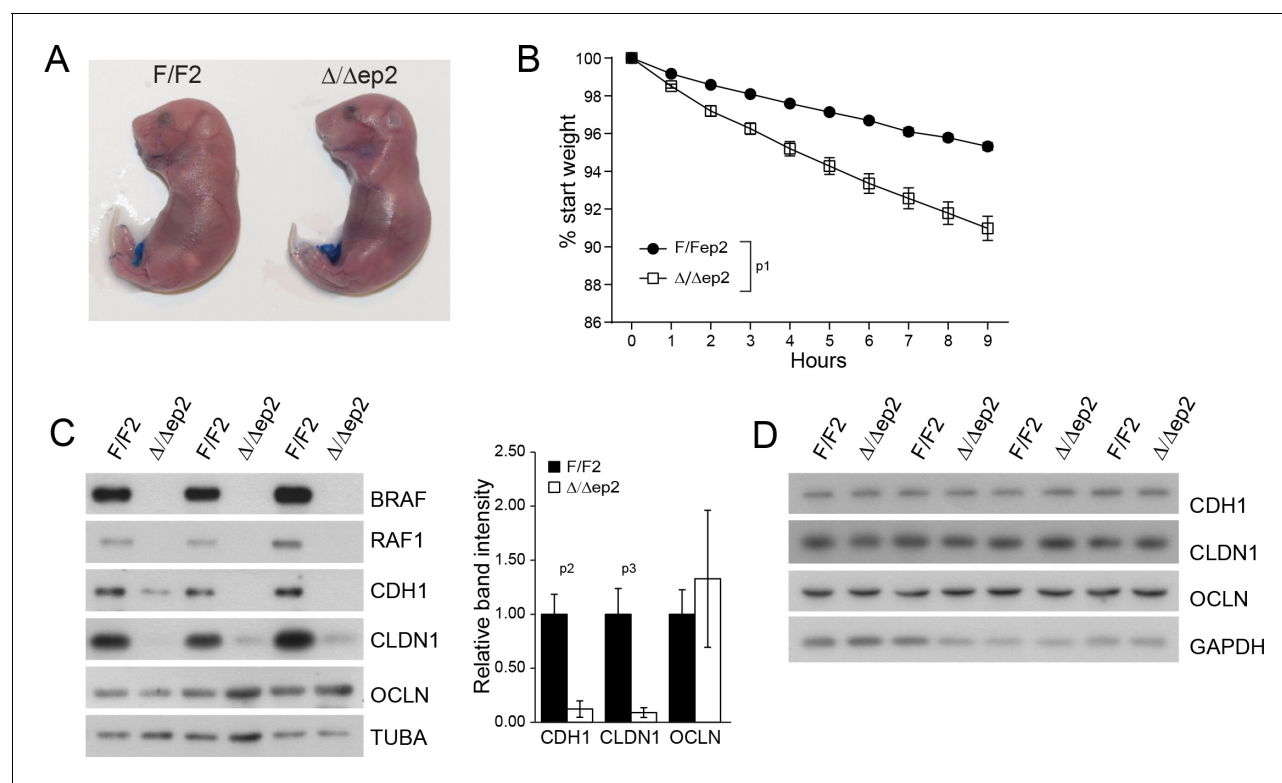

**Figure 4.** Transient inside-outside barrier defects in  $\Delta/\Delta ep2$  animals. (A) Intact outside-in barrier function (determined by toluidine blue penetration of the stratum corneum) in E19.5-day-old  $\Delta/\Delta ep2$  embryos compared to controls ( $n = 6$ ). Representative pictures; two independent experiments were performed with identical results. (B) Increased water loss in the  $\Delta/\Delta ep2$  E18.5 embryos as demonstrated by weight analysis. Results are displayed as percentage of initial weight ( $n = 41$  for F/F2 and  $n = 11$  for  $\Delta/\Delta ep2$ ). The data was analyzed by two-way analysis of variance (ANOVA) test. (C, D) Immunoblot analysis of CDH1, CLDN1 and OCLN expression in epidermal lysates of 3 days old (C,  $n = 3$ ; quantification shown in the plot, performed as in **Figure 1F**) or 3 weeks old  $\Delta/\Delta ep2$  animals. TUBA and GAPDH are shown as loading controls. Data represent mean  $\pm$  SEM.  $p1 = 0.0001$ ,  $p2 = 0.028$ ,  $p3 = 0.020$ .

DOI: [10.7554/eLife.14012.008](https://doi.org/10.7554/eLife.14012.008)



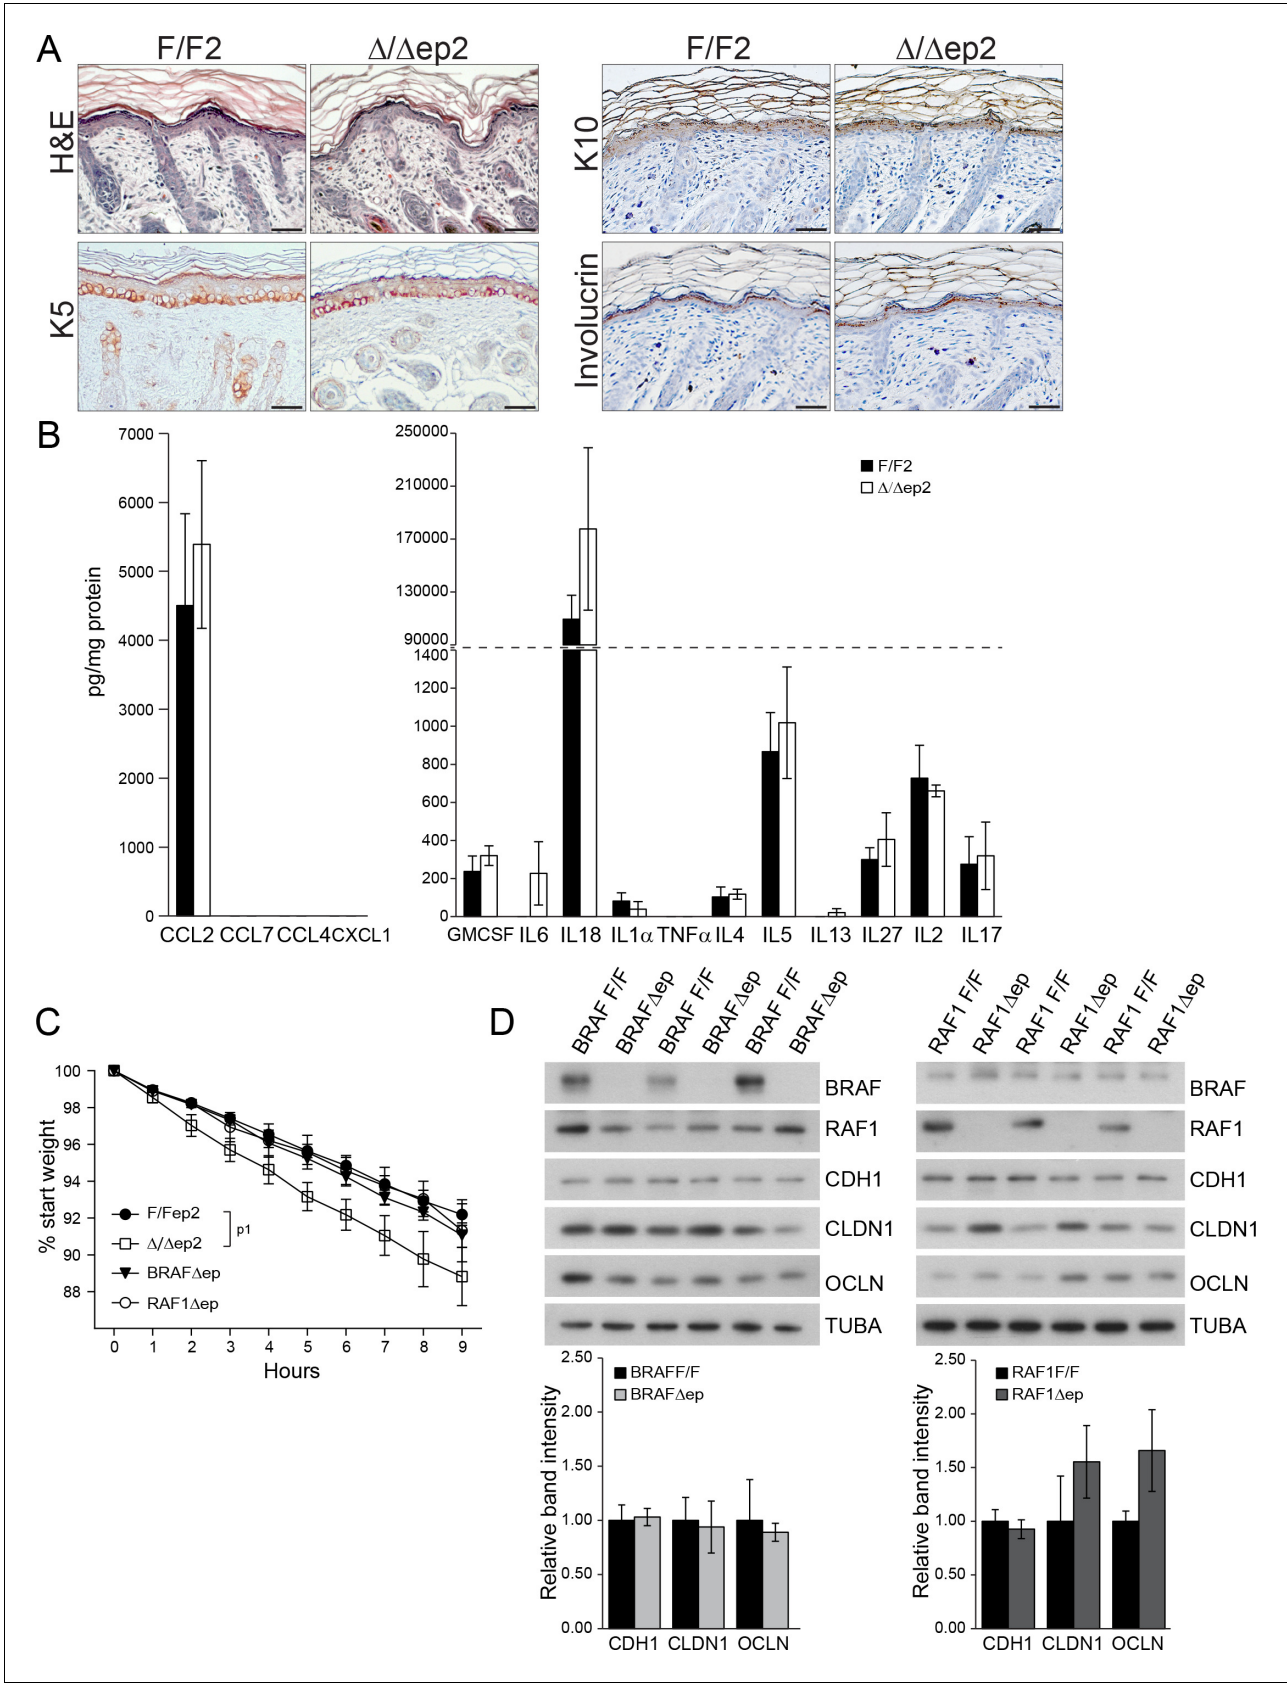

**Figure 4—figure supplement 1.** Skin architecture and inflammatory factors in 3 days old F/F2 and  $\Delta/\Delta$ ep2 animals. (A) Similar skin architecture in F/F2 and  $\Delta/\Delta$ ep2 pups based on H and E staining and on the analysis of differentiation markers (K5, K10 and involucrin). Scale bars, 50  $\mu$ m. (B) Inflammatory chemokines and cytokines in epidermal lysates (n = 3). (C) Transepidermal water loss as determined by body weight analysis in E18.5 embryos lacking either BRAF (BRAF $\Delta/\Delta$ ep) or RAF1 (RAF1 $\Delta/\Delta$ ep) in the epidermis (n = 10 for F/F2, n = 4 for  $\Delta/\Delta$ ep2, n = 3 for BRAF $\Delta/\Delta$ ep and n = 6 for RAF1 $\Delta/\Delta$ ep). The data was analyzed by two-way analysis of variance (ANOVA) test. (D) Expression levels of tight junction proteins in the epidermis of P3 BRAF $\Delta/\Delta$ ep or RAF1 $\Delta/\Delta$ ep pups quantified and plotted as in **Figure 1F** (n = 3). TUBA is used as a loading control. Data represent mean  $\pm$  SEM. p1 = 0.0442.

DOI: [10.7554/eLife.14012.009](https://doi.org/10.7554/eLife.14012.009)

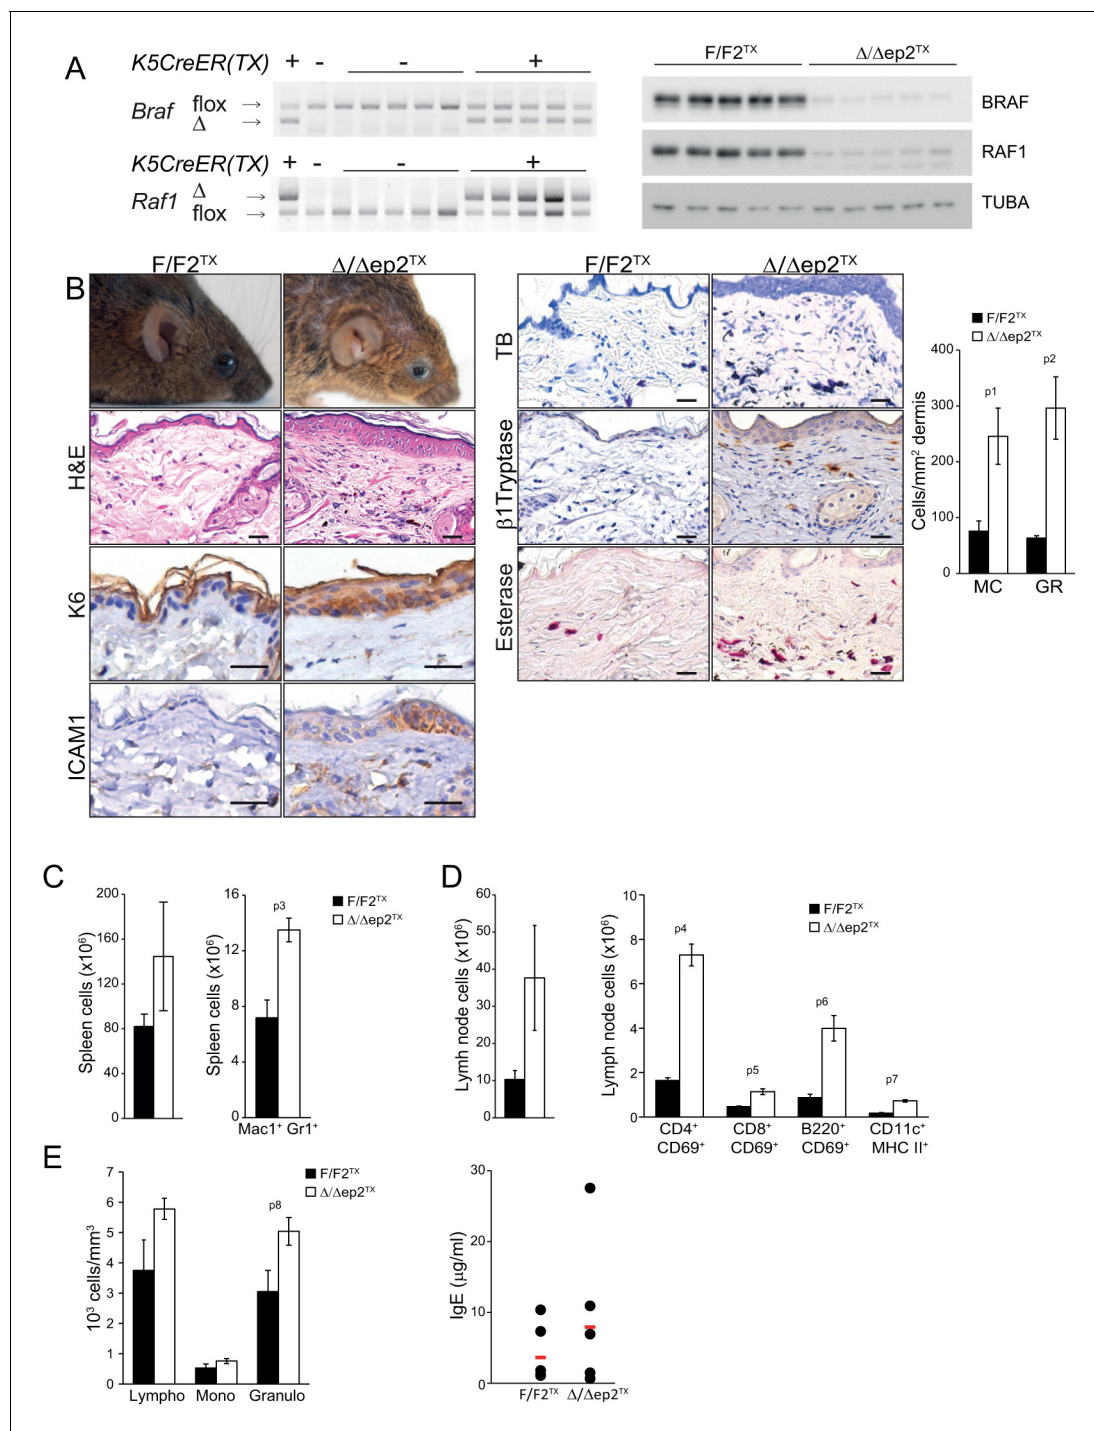

**Figure 5.** Local and systemic inflammation in  $\Delta/\Delta ep2^{TX}$  mice. (A) PCR analysis of tail tissue (left) and immunoblot analysis of epidermal lysates obtained from  $\Delta/\Delta ep2^{TX}$  animals. (B) Macroscopic appearance of  $\Delta/\Delta ep2^{TX}$  mice and histological analysis of H&E sections. Scale bars, 25  $\mu m$ . Infiltrating cells: mast cells (MC; TB<sup>+</sup>), activated mast cells ( $\beta 1$  Tryptase<sup>+</sup>; modest), granulocytes (GR; esterase<sup>+</sup>). The plot shows a quantification of the histological analysis. (C) Mild splenomegaly with increased numbers of *Mac1<sup>+</sup>Gr1<sup>+</sup>* cells in  $\Delta/\Delta ep2^{TX}$  animals. (D) Activated T cells, B cells and dendritic cells in the lymph nodes of  $\Delta/\Delta ep2^{TX}$  animals. (E) Mild lymphocytosis and significantly elevated granulocyte numbers in  $\Delta/\Delta ep2^{TX}$  mice. The right panel shows comparable IgE plasma levels in control and  $\Delta/\Delta ep2^{TX}$  animals. Data are plotted as mean  $\pm$  SEM (n = 5; p1 = 0.034, p2 = 0.014, p3 = 0.005, p4 = 2.63E-4, p5 = 0.001, p6 = 0.001, p7 = 0.019 and p8 = 0.042).

DOI: 10.7554/eLife.14012.010

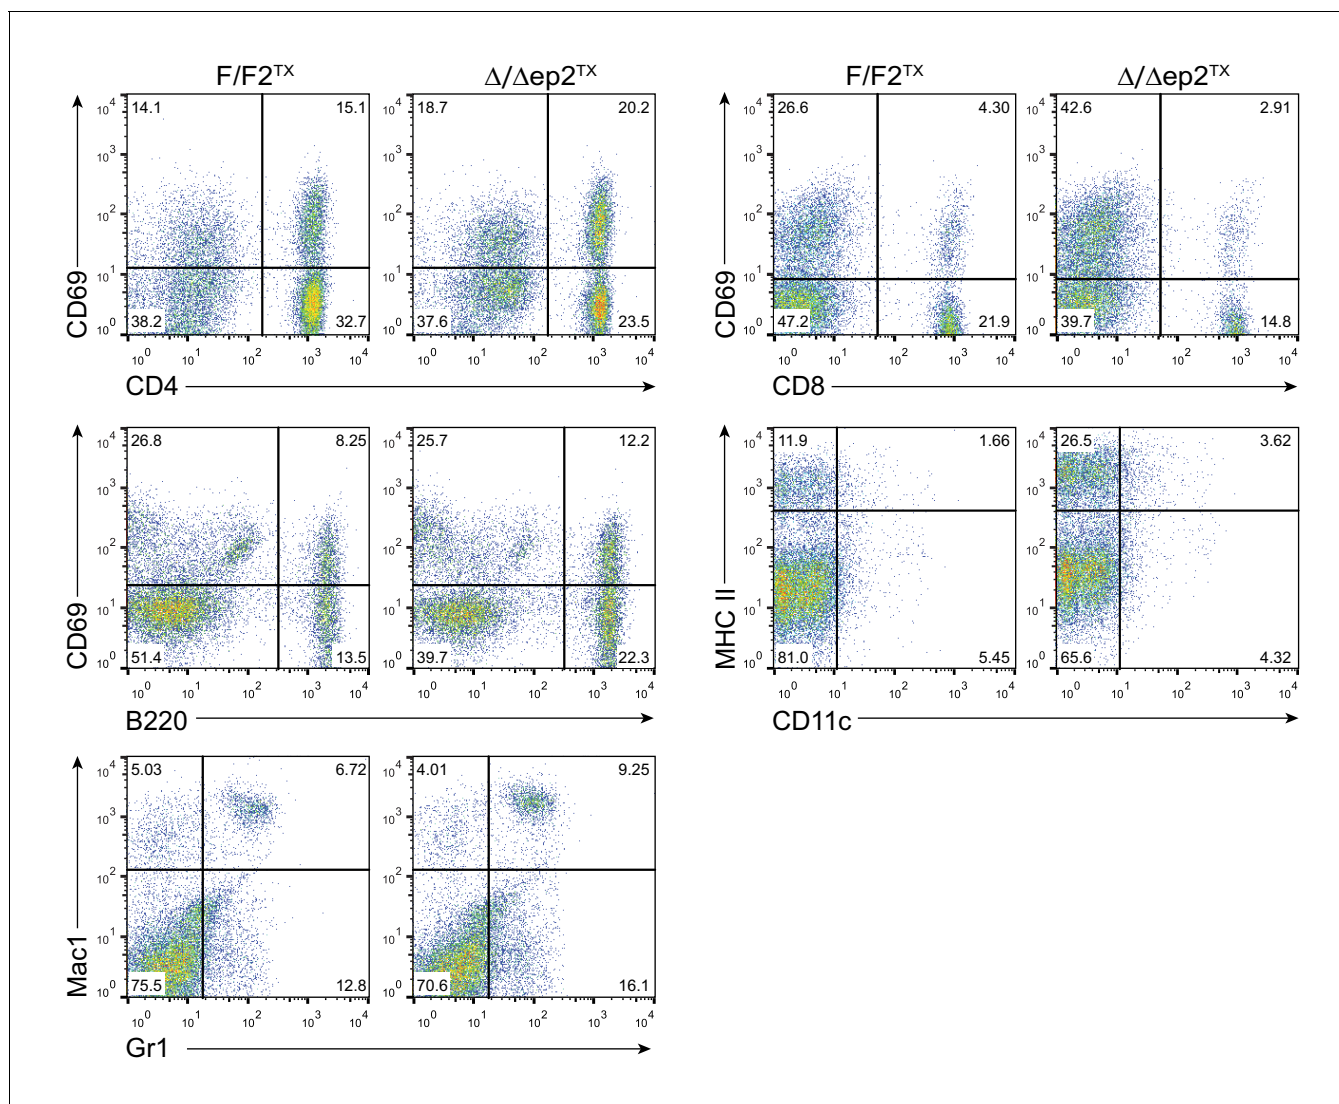

**Figure 5—figure supplement 1.** Representative FACS analysis of lymph node and spleen cells isolated from adult F/F2<sup>TX</sup> Δ/Δep2<sup>TX</sup> animals. The percentage of activated lymphocytes in lymph nodes was assessed by combining lineage specific markers (CD4 and CD8 for T lymphocytes; B220 for B lymphocytes) with the activation marker CD69. Activated dendritic cells were identified by staining with CD11c and MHC II antibodies. Myeloid cells in the spleen were analyzed by staining with Mac1 and Gr1 antibodies. The percentage of single and double positive cells is indicated.

DOI: [10.7554/eLife.14012.011](https://doi.org/10.7554/eLife.14012.011)



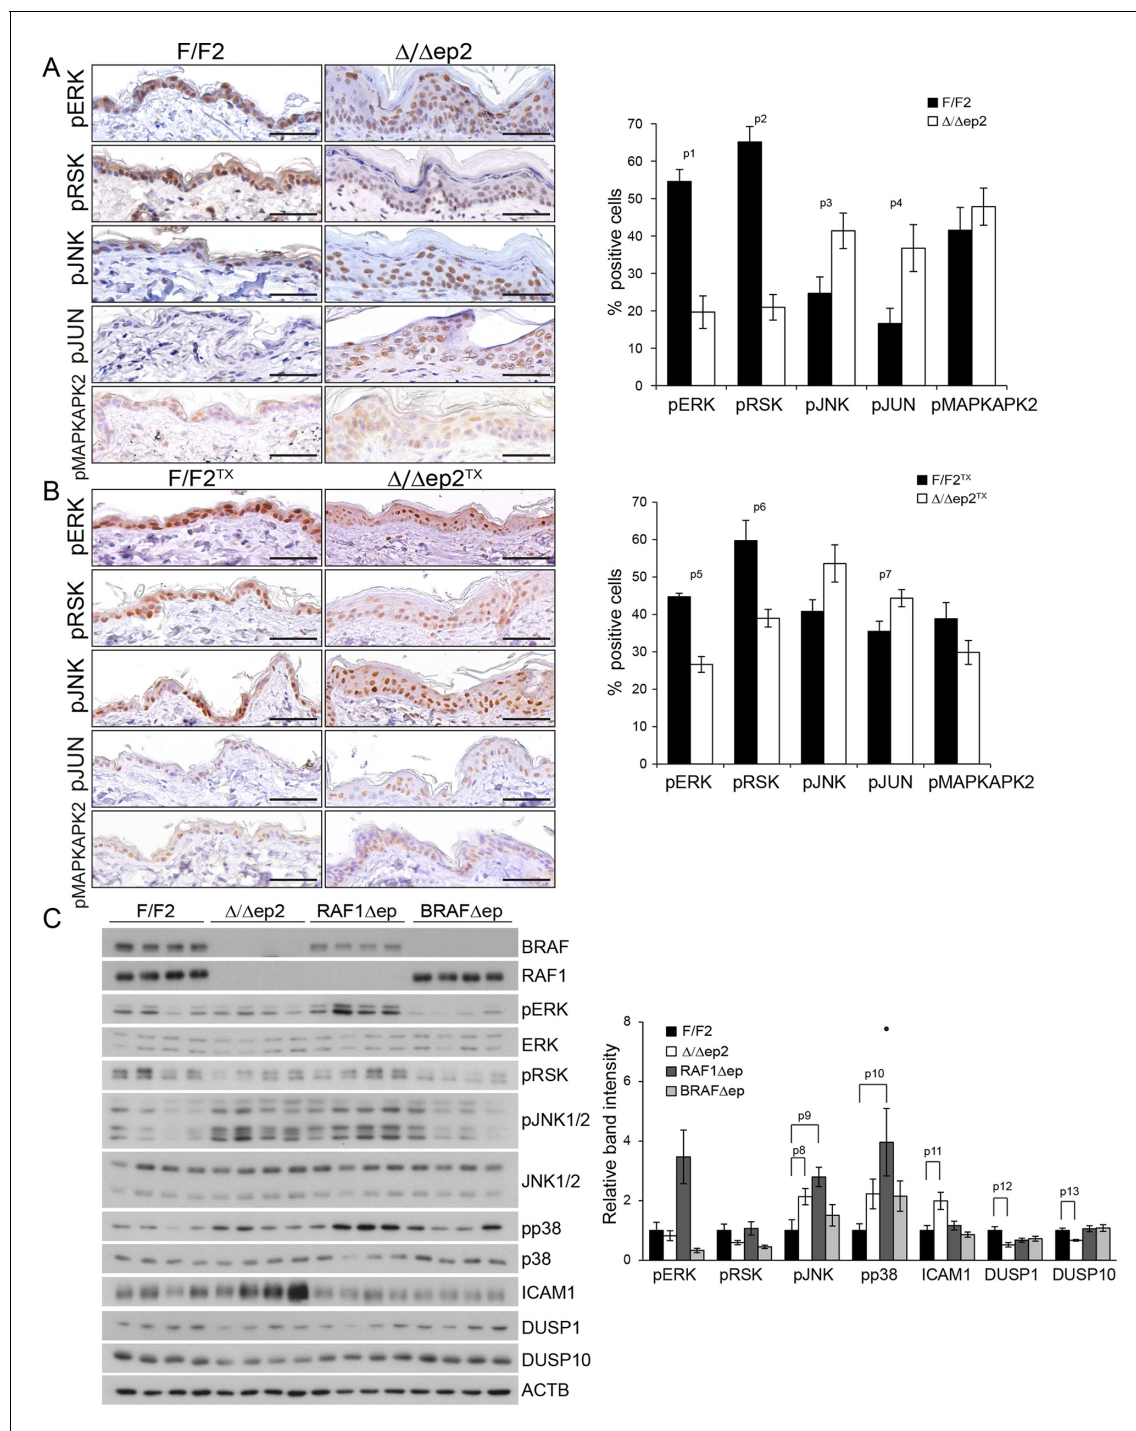

**Figure 6.** Molecular consequences of BRAF/RAF1 deletion in primary keratinocytes and epidermis. (A, B) Immunohistochemical analysis of pERK and pJNK, their downstream targets pRSK and pJUN, and the p38 downstream target pMAPKAPK2 in adult F/F2 and Δ/Δep2 (A), and F/F2<sup>TX</sup> Δ/Δep2<sup>TX</sup> epidermis (B). Scale bars, 50 μm. The plots on the right show the percentage of positive cells in the epidermis (n = 4–5). (C) Immunoblot analysis of MAPK signaling in 3 weeks old epidermal lysates (n = 4), quantified as in Figure 1F. ACTB is shown as a loading control. Phosphorylation is expressed as the ratio between the signals obtained with the phosphospecific antibody and with the protein-specific antibody. In both cases, the data are normalized to one of the F/F2 samples, which was arbitrarily set as 1. Data are plotted as mean ± SEM. p1 = 2.73E-4, p2 = 4.15E-5, p3 = 0.042, p4 = 0.031, p5 = 0.001, p6 = 0.023, p7 = 0.038, p8 = 0.049, p9 = 0.010, p10 = 0.030, p11 = 0.033, p12 = 0.023 and p13 = 0.018.

DOI: 10.7554/eLife.14012.012

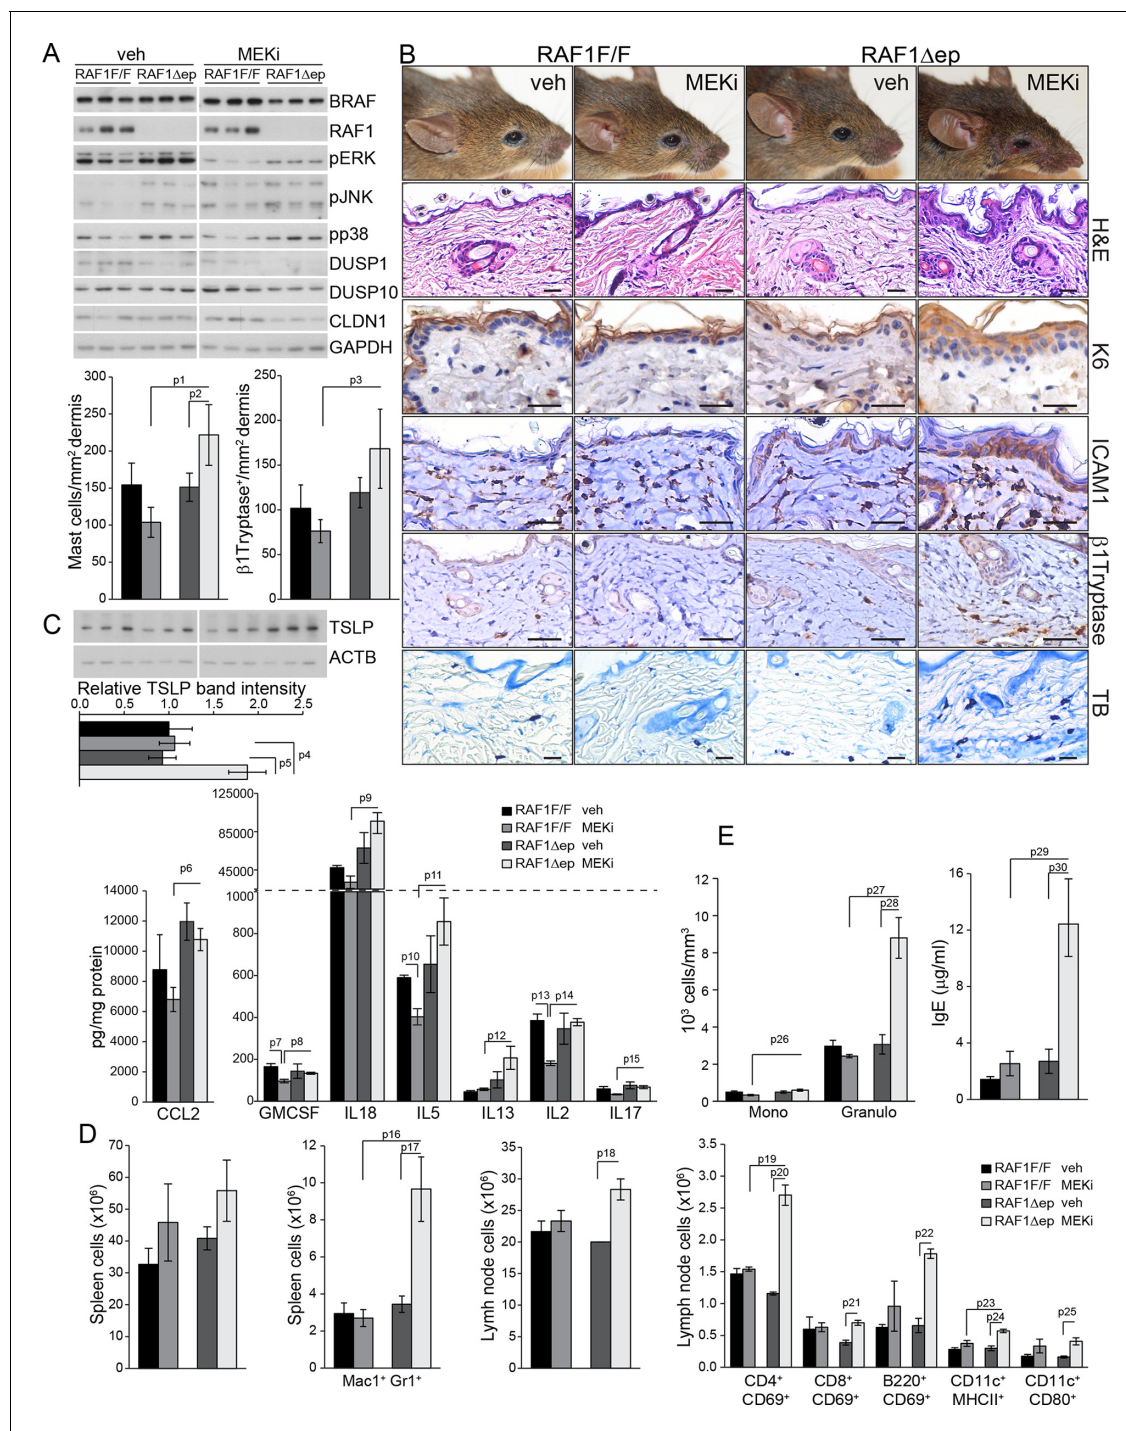

**Figure 7.** MEK/ERK inhibition in RAF1Δep animals phenocopies the Δ/Δep2 phenotype. RAF1Δep animals were treated with a MEK inhibitor (MEKi; trametinib, daily by gavage for 32 days). (A) Immunoblot of epidermal lysates showing the effect of MEKi on the phosphorylation and expression of the indicated proteins. GAPDH is shown as a loading control. (B) Macroscopic appearance (top panels) and histological analysis of vehicle versus MEKi-treated animals. Mast cells (TB<sup>+</sup>) and activated mast cells (β1 Tryptase<sup>+</sup>) are quantified in the plots on the left. Scale bars 25 μm. (C) Inflammatory chemokines and cytokines in epidermal lysates of MEKi treated-mice. TSLP levels were determined by immunoblotting and quantified and analyzed as in **Figure 1F**. ACTB served as a loading control. (D) Increased numbers of splenic Mac1<sup>+</sup> Gr1<sup>+</sup> cells and of activated T cells, B cells and dendritic cells in the lymph nodes of MEKi-treated RAF1Δep animals. (E) Mild monocytosis and granulocytosis in MEKi-treated RAF1Δep animals and elevated amount of plasma IgE. Data represent mean ± SEM (n = 3; p1 = 0.002, p2 = 0.017, p3 = 0.003, p4 = 0.025, p5 = 0.041, p6 = 0.022, p7 = 0.023, p8 = 0.029, p9 = 0.010, p10 = 0.032, p11 = 0.044, p12 = 0.053, p13 = 0.015, p14 = 0.001, p15 = 0.031, p16 = 0.049, p17 = 0.026, p18 = 0.038, p19 = 0.015, p20 = 0.001, p21 = 0.005, p22 = 0.002, p23 = 0.033, p24 = 0.006, p25 = 0.039, p26 = 0.025, p27 = 0.004, p28 = 0.020, p29 = 0.027 and p30 = 0.028).

Figure 7 continued on next page

Figure 7 continued

DOI: [10.7554/eLife.14012.013](https://doi.org/10.7554/eLife.14012.013)

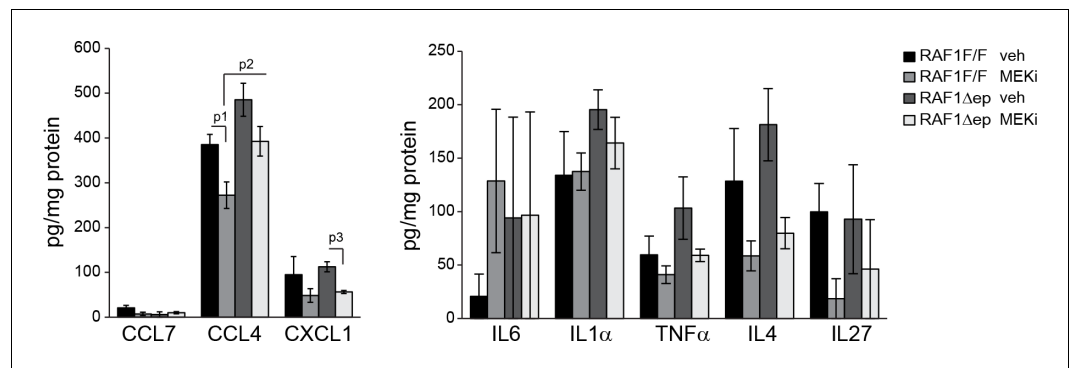

**Figure 7—figure supplement 1.** Epidermal chemokine and cytokine levels in MEKi treated mice. Inflammatory chemokines and cytokines in epidermal lysates of vehicle or MEKi treated mice. Data represents mean  $\pm$  SEM ( $n = 3$ ;  $p_1 = 0.043$ ,  $p_2 = 0.054$  and  $p_3 = 0.029$ ).

DOI: [10.7554/eLife.14012.014](https://doi.org/10.7554/eLife.14012.014)



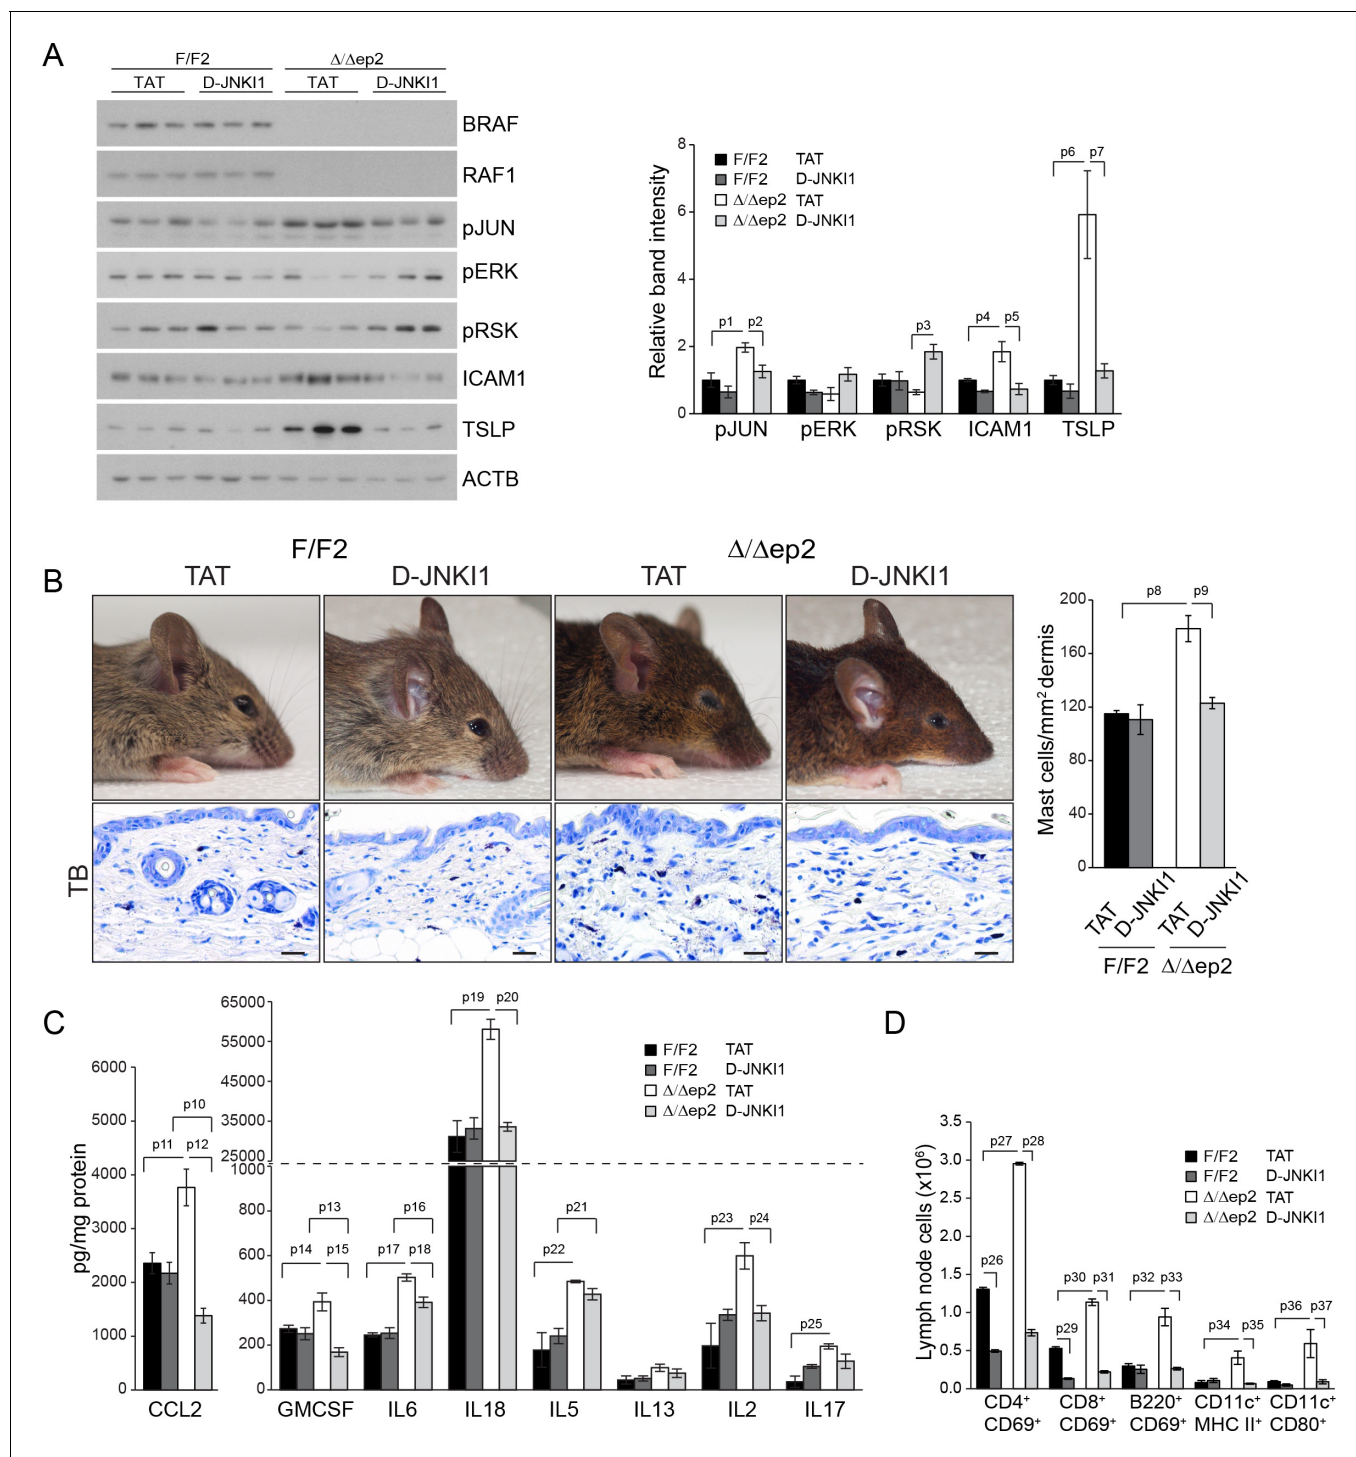

**Figure 8.** D-JNK11 treatment rescues inflammation in  $\Delta/\Delta$ ep2 mice. Mice were treated with D-JNK11 or TAT peptide (22 mg/kg i.p. at 10 days of age) and analyzed after 12 days (A) D-JNK11 treatment prevents disease onset in  $\Delta/\Delta$ ep2 mice. Immunoblot of epidermal lysates showing the effect of D-JNK11 on the phosphorylation and expression of the indicated proteins, quantified as in **Figure 1F**. ACTB is shown as a loading control. (B–D) Decreased eyelid inflammation, mast cells infiltration (B; TB<sup>+</sup>; quantified in the plot on the right), epidermal chemokine/cytokine levels (C) and activated T cells, B cells and dendritic cells in lymph nodes (D) in D-JNK11-treated  $\Delta/\Delta$ ep2 mice. Scale bars, 25  $\mu$ m. Data represent mean  $\pm$  SEM (n = 3–5; p1 = 0.026, p2 = 0.042, p3 = 0.022, p4 = 0.048, p5 = 0.044, p6 = 0.020, p7 = 0.025, p8 = 0.018, p9 = 0.016, p10 = 0.014, p11 = 0.023, p12 = 0.011, p13 = 0.039, p14 = 0.049, p15 = 0.015, p16 = 0.003, p17 = 1.70E-4, p18 = 0.008, p19 = 0.008, p20 = 0.004, p21 = 0.003, p22 = 0.017, p23 = 0.026, p24 = 0.027, p25 = 0.005, p26 = 2.13E-6, p27 = 4.50E-8, p28 = 1.39E-5, p29 = 0.001, p30 = 0.001, p31 = 0.001, p32 = 0.023, p33 = 2.35E-4, p34 = 0.050, p35 = 0.002, p36 = 0.050 and p37 = 0.012).

Figure 8 continued on next page

Figure 8 continued

DOI: [10.7554/eLife.14012.015](https://doi.org/10.7554/eLife.14012.015)

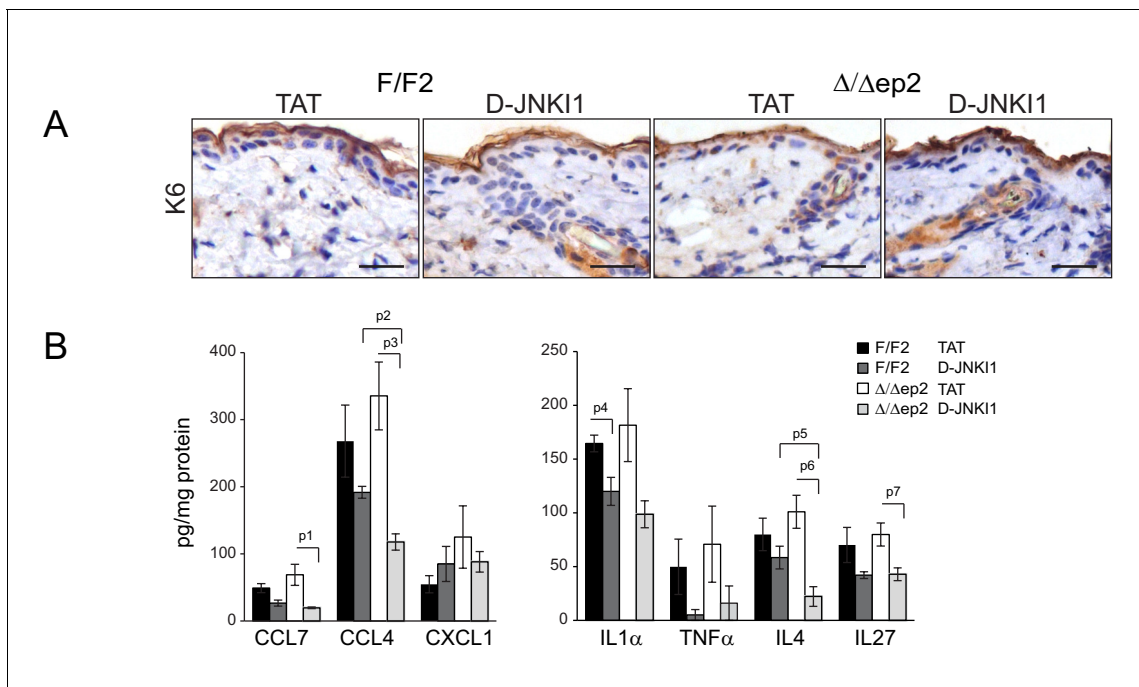

**Figure 8—figure supplement 1.** K6 expression and epidermal chemokine and cytokine levels in D-JNKI1-treated mice. **(A)** K6 expression is indistinguishable in TAT or D-JNKI1 treated F/F2 and  $\Delta/\Delta\text{ep}2$  littermates. Scale bars, 25  $\mu\text{m}$ . **(B)** Inflammatory chemokines and cytokines in epidermal lysates of TAT or D-JNKI1-treated mice. Data represent mean  $\pm$  SEM ( $n = 3-5$ ;  $p_1 = 0.005$ ,  $p_2 = 0.001$ ,  $p_3 = 0.043$ ,  $p_4 = 0.026$ ,  $p_5 = 0.032$ ,  $p_6 = 0.016$  and  $p_7 = 0.051$ ).

DOI: [10.7554/eLife.14012.016](https://doi.org/10.7554/eLife.14012.016)

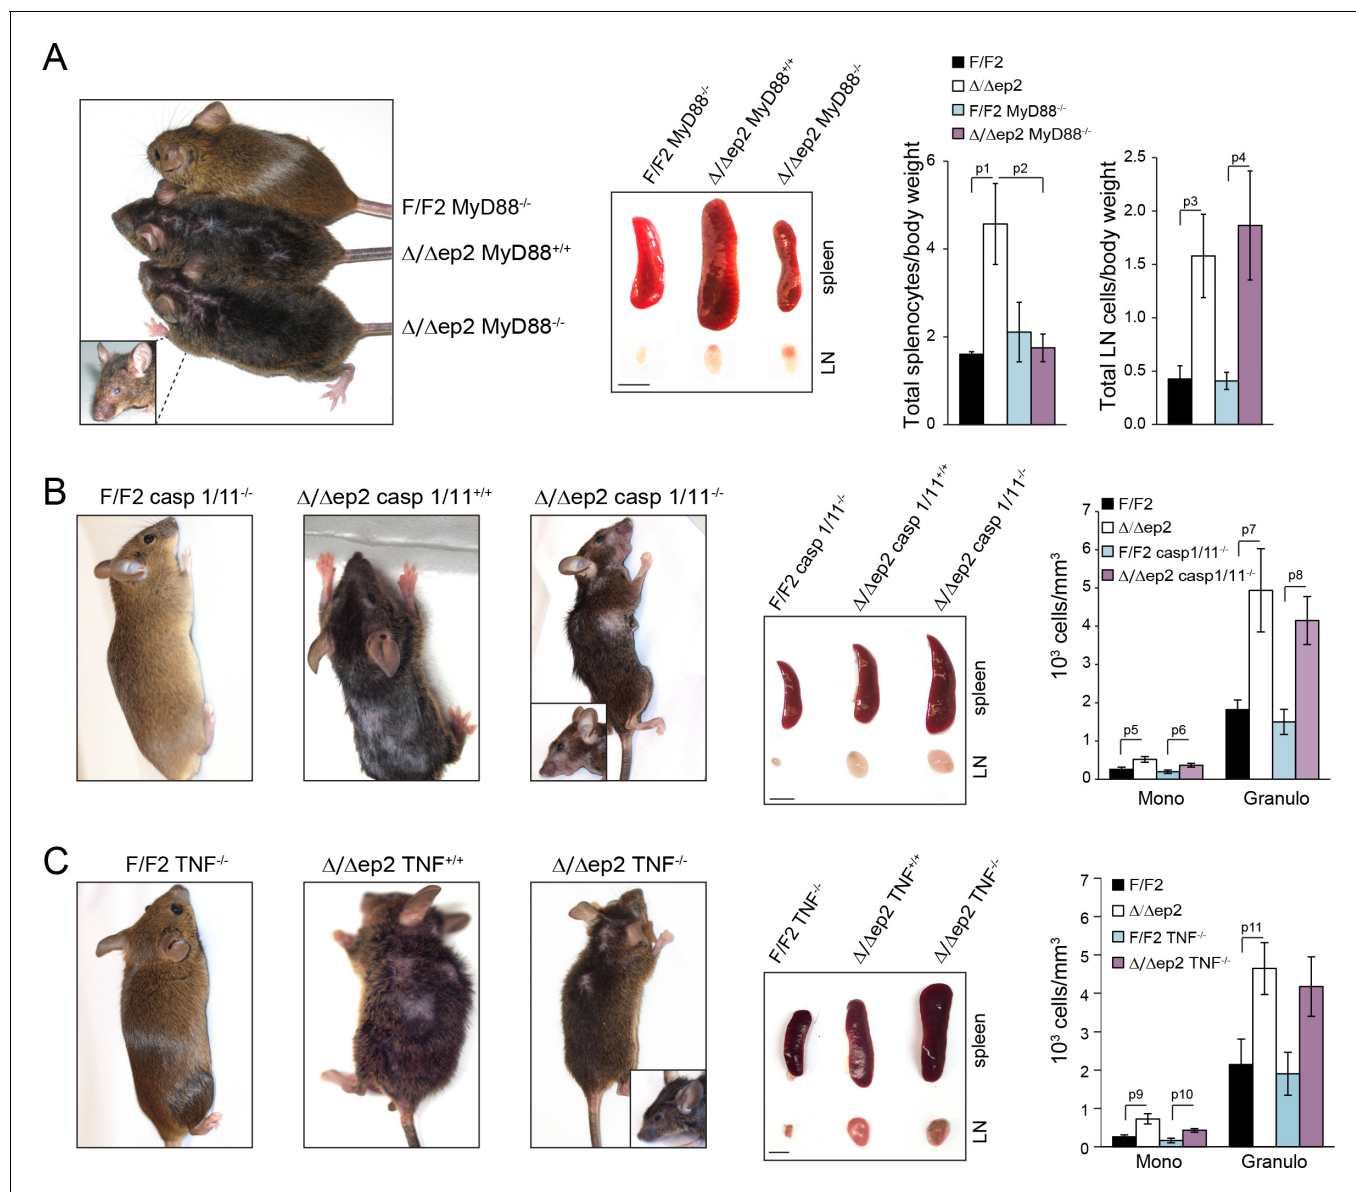

**Figure 8—figure supplement 2.** The inflammatory phenotype of Δ/Δep2 mice is not rescued by MyD88, caspase 1/11, or TNF knockout. Macroscopic appearance, spleen and lymph node size and circulating blood cell analysis are shown for the indicated genotypes (A–C). (A) Representative pictures of 4 month old Δ/Δep2, Δ/Δep2 MyD88<sup>-/-</sup> and control animals. Plots on the right represent the ratio between total splenocytes or lymph node cell numbers and body weight (n = 3–4). (B) Representative pictures and hemogram of 4 month old Δ/Δep2, Δ/Δep2 caspase 1/11<sup>-/-</sup> and control animals (n = 5–6). (C) Representative pictures and hemogram of 4 month old Δ/Δep2, Δ/Δep2 TNF<sup>-/-</sup> and control animals (n = 4–5). The macroscopic appearance of at least ten mice per genotype was monitored. Data represent mean ± SEM. p1 = 0.041, p2 = 0.052, p3 = 0.024, p4 = 0.023, p5 = 0.026, p6 = 0.034, p7 = 0.023, p8 = 0.007, p9 = 0.031, p10 = 0.011, and p11 = 0.034.

DOI: 10.7554/eLife.14012.017



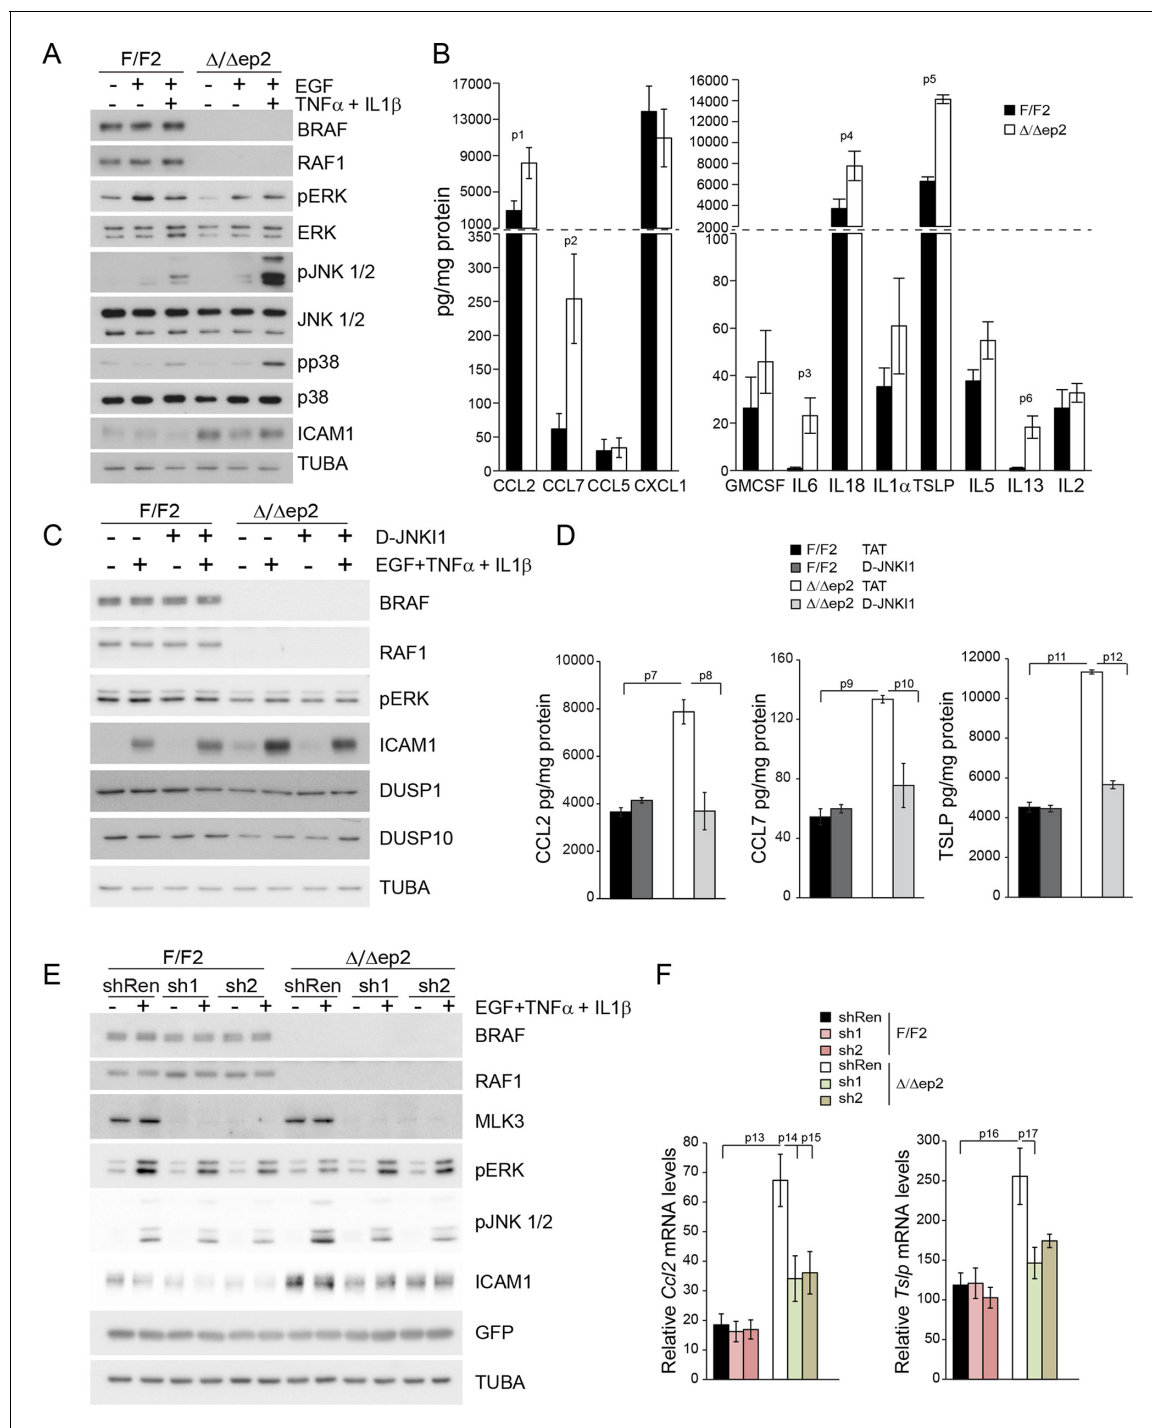

**Figure 9.** Increased stress kinase signaling and JNK pathway-dependent cytokine and chemokine production by primary keratinocytes lacking BRAF and RAF1. (A) Reduced ERK phosphorylation and increased JNK/p38 activation in primary  $\Delta/\Delta$ ep2 keratinocytes stimulated with EGF and/or TNF $\alpha$  and IL1 $\beta$  for 15 min. (B) Increased cytokine and chemokine production in primary  $\Delta/\Delta$ ep2 keratinocytes treated with EGF, TNF $\alpha$  and IL1 $\beta$  for 24 hr. Cytokine and chemokine production was determined by multiplex analysis, except for TSLP which was quantified by ELISA. Data represent mean  $\pm$  SEM of 3–5 biological replicates. (C–D) Cells were pretreated with D-JNKI1 inhibitors prior to stimulation with EGF, TNF $\alpha$  and IL1 $\beta$  for 15 min (C) or 24 hr (D). Data represent the mean  $\pm$  SEM of technical replicates ( $n = 3$ ). (E–F) Effect of shRNA-mediated *MLK3* silencing on ERK and JNK phosphorylation and ICAM1 expression (E; stimulation with EGF, TNF $\alpha$  and IL1 $\beta$  for 15 min) and on the expression of *Ccl2* and *Tslp* mRNA (F; stimulation with EGF, TNF $\alpha$  and IL1 $\beta$  for 24 hr) by F/F2 and  $\Delta/\Delta$ ep2 keratinocytes. shRen, shRNA targeting Renilla, used as a control; sh1 and sh2, targeting *MLK3*, binding sites nucleotide 2266–2285 and 2383–2402, respectively. The shRNAs were encoded by lentiviral vectors coexpressing GFP. GFP immunoblots are shown to confirm similar levels of infection in all samples. Data represent mean  $\pm$  SEM of 4 biological replicates. Each keratinocyte culture represents a pool of three

Figure 9 continued on next page

Figure 9 continued

mice. Immunoblots are representative of three independent experiments.  $p_1 = 0.041$ ,  $p_2 = 0.040$ ,  $p_3 = 1.89\text{E-}4$ ,  $p_4 = 0.018$ ,  $p_5 = 0.046$ ,  $p_6 = 0.020$ ,  $p_7 = 0.008$ ,  $p_8 = 0.016$ ,  $p_9 = 0.001$ ,  $p_{10} = 0.018$ ,  $p_{11} = 3.23\text{E-}4$ ,  $p_{12} = 1.47\text{E-}4$ ,  $p_{13} = 0.007$ ,  $p_{14} = 0.03$ ,  $p_{15} = 0.035$ ,  $p_{16} = 0.023$  and  $p_{17} = 0.046$ .

DOI: [10.7554/eLife.14012.018](https://doi.org/10.7554/eLife.14012.018)

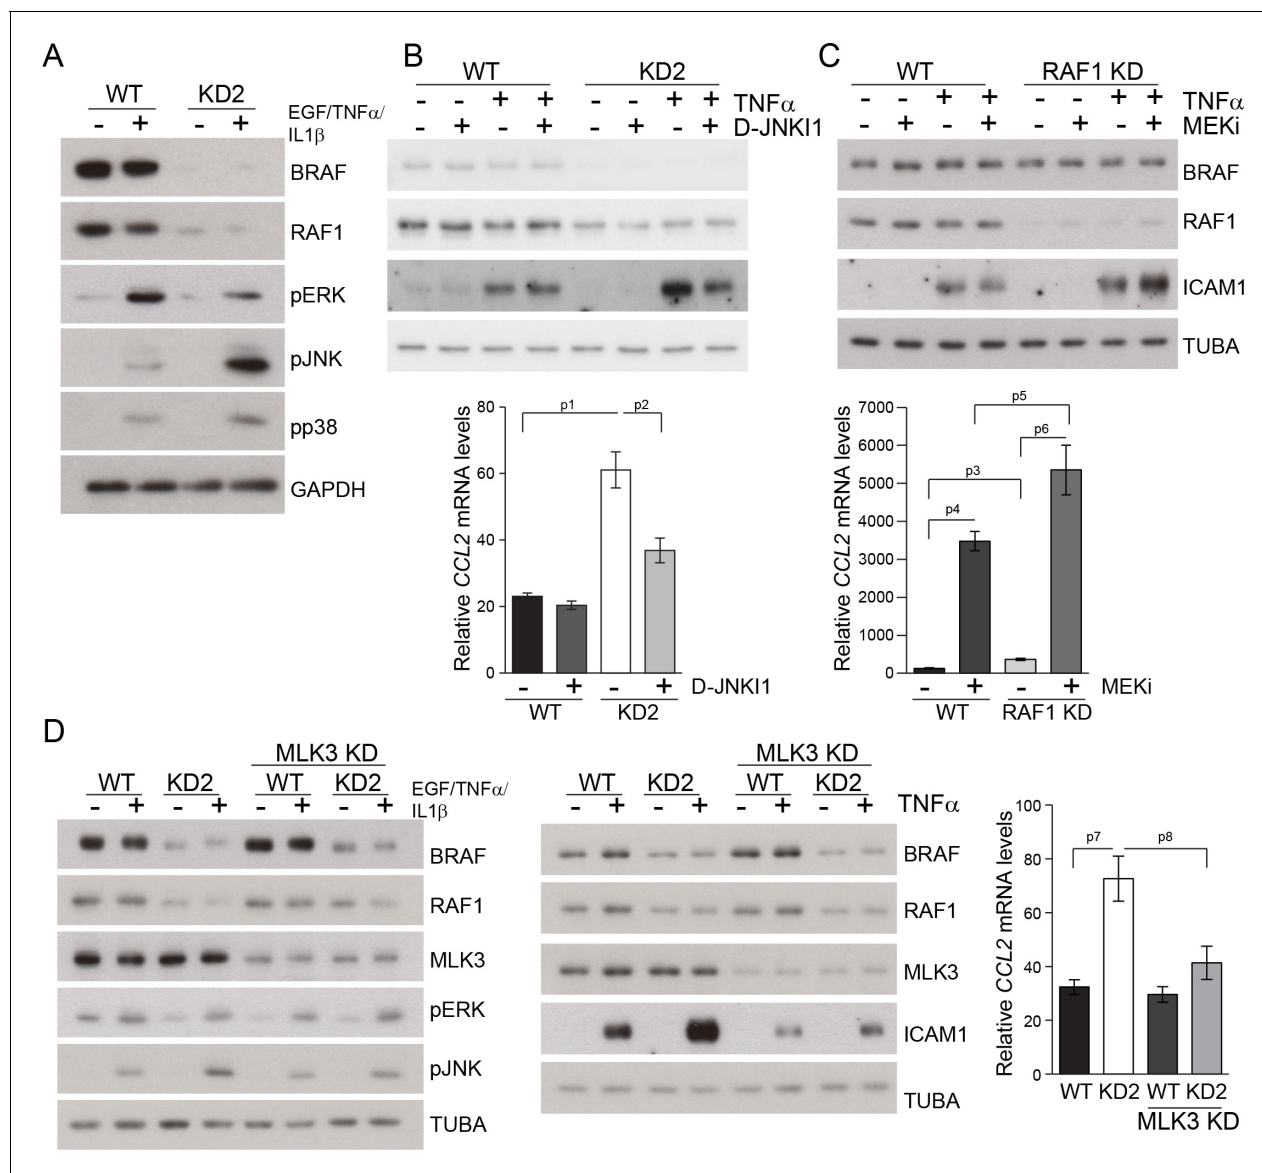

**Figure 9—figure supplement 1.** Compound knockdown (KD2) of *BRAF* and *RAF1* induce the expression of inflammation markers by HaCat cells in a MLK3/JNK-dependent manner. (A) Reduced ERK and increased JNK/p38 activation in *BRAF* and *RAF1* knockdown (KD2) HaCat cells stimulated with EGF, TNF $\alpha$  and IL1 $\beta$  for 15 min. (B) D-JNKI1 reduces ICAM1 and *CCL2* ( $n = 4$ ) expression in KD2 cells treated with TNF $\alpha$ . (C) MEKi induces ICAM1 and *CCL2* ( $n = 3$ ) expression in RAF1KD cells treated with TNF $\alpha$ . In (B–C), ICAM1 expression was measured after a 3 hr, *CCL2* expression after a 24 hr treatment with TNF $\alpha$ . (D) Effect of *MLK3* silencing on ERK and JNK phosphorylation in WT and KD2 cells stimulated as in (A). *MLK3* was silenced using a pool of oligonucleotides targeting the following regions: 686–704; 1489–1507; 2122–2138; and 2348–2366. *MLK3* KD cells stimulated as in (B–C) show a decrease in JNK activation, ICAM1 and *CCL2* ( $n = 7$ ) expression. Immunoblots are representative of three independent experiments. qPCR data represent mean  $\pm$  SEM of three independent experiments run in duplicates ( $p1 = 4.62E-4$ ,  $p2 = 0.013$ ,  $p3 = 0.050$ ,  $p4 = 8.60E-8$ ,  $p5 = 0.050$ ,  $p6 = 0.001$ ,  $p7 = 0.001$  and  $p8 = 0.012$ ).

DOI: [10.7554/eLife.14012.019](https://doi.org/10.7554/eLife.14012.019)

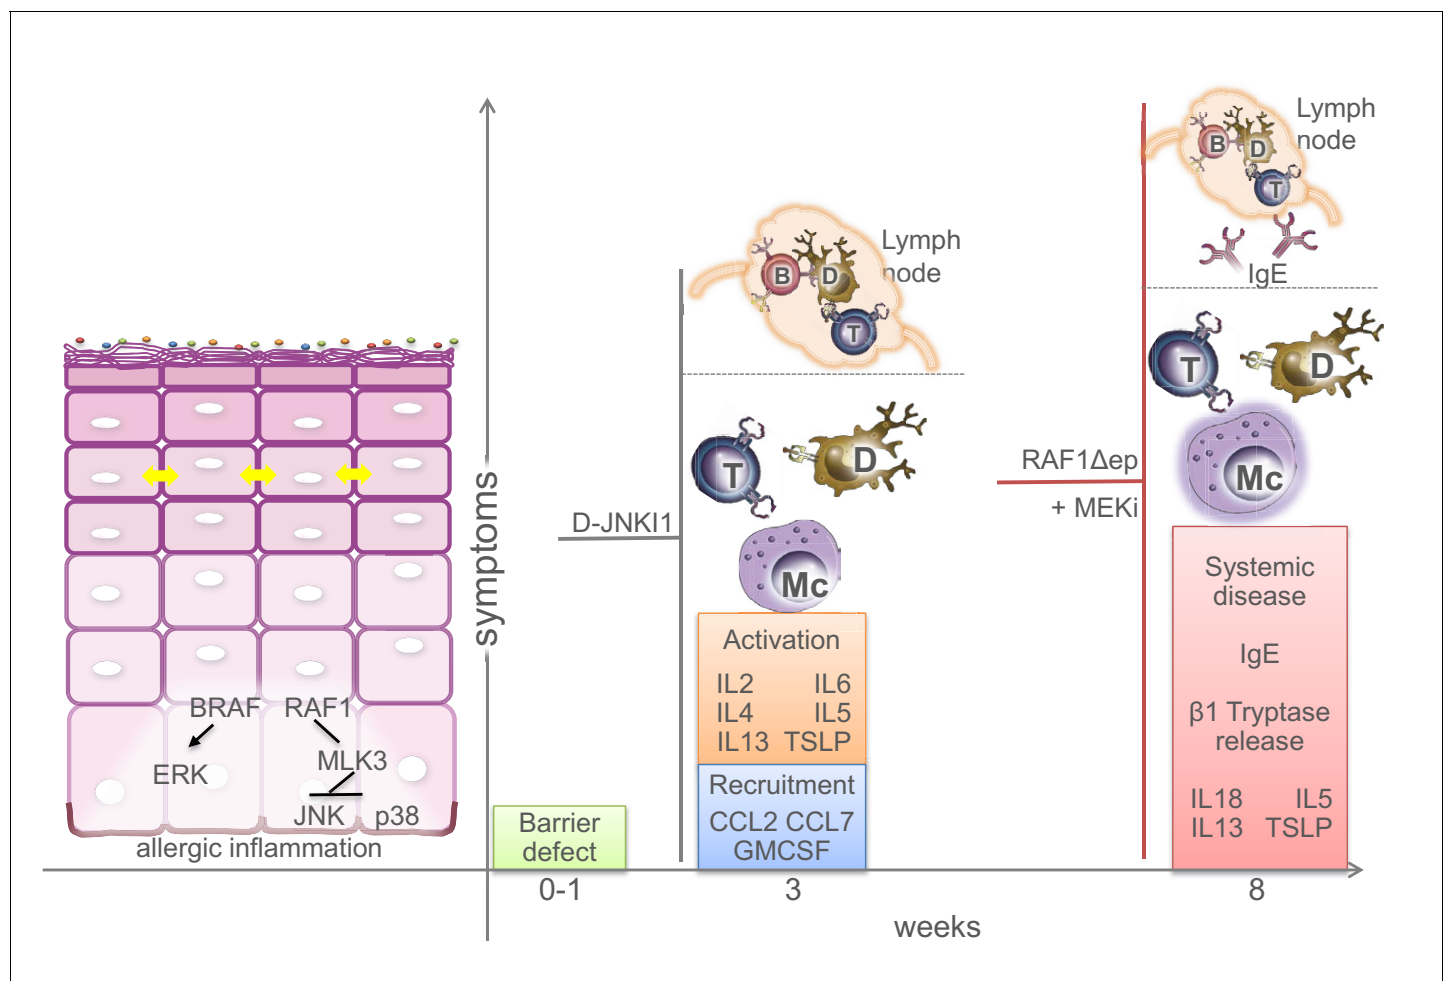

**Figure 10.** Molecular and physiological defects in mice lacking BRAF and RAF1 in the epidermis. Compound BRAF/RAF1 ablation in keratinocytes induces an imbalance in MAPK signaling, resulting in low ERK, high JNK activation. This causes early inside-outside barrier defects accompanied by reduced CDN1 expression (yellow arrows), followed by a breakdown of the immunological barrier and local as well as systemic allergic inflammation akin to atopic dermatitis, characterized by the presence of Th2 cytokines in the epidermis. The phenotype can be prevented by inhibiting the JNK pathway in  $\Delta/\Delta$ ep2 animals and cells, and phenocopied by inhibiting the ERK pathway in Raf1 $\Delta/\Delta$ ep animals. Systemic effects (lymph node involvement, circulating IgEs) are separated from local effect by a dashed line. B (B cells), T (T cells), Mc (Mast cells), D (dendritic cells).

DOI: [10.7554/eLife.14012.020](https://doi.org/10.7554/eLife.14012.020)
